# Supplementary material for: Deciphering common and specific transcriptional immune responses in pea towards the oomycete pathogens Aphanomyces euteiches and Phytophthora pisi
Source: PubMed Central journal article supplement (PMC4546216; doi:10.1186/s12864-015-1829-1), 2015-08-21

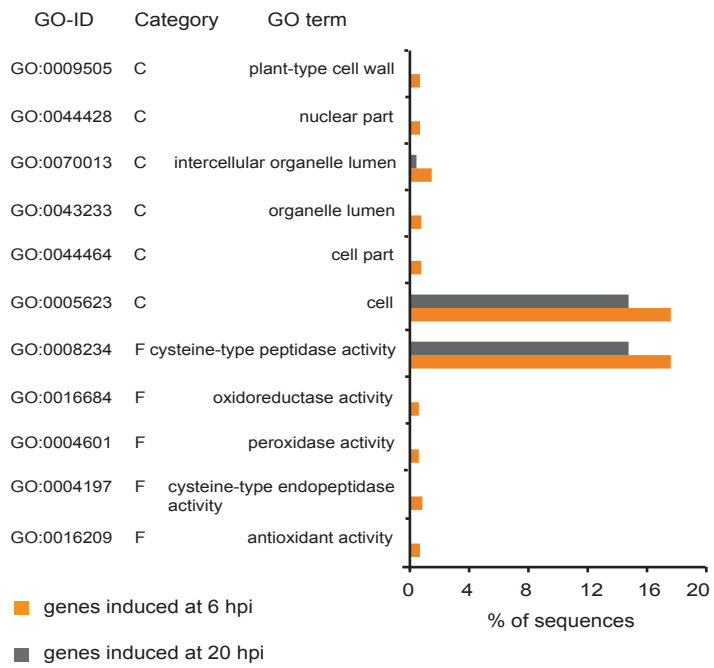

Supplement: 12864_2015_1829_MOESM6_ESM.pdf [file 12864_2015_1829_MOESM6_ESM.pdf]
